# Supplementary material for: An 800 kyr planktonic δ 18 O stack for the Western Pacific Warm Pool
Source: Copernicus journal article supplement (doi:10.5194/essd-16-701-2024), 2024-01-30
Supplement: Supplementary file 1 [file essd-16-701-2024-supplement.pdf]

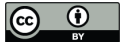

*Supplement of*

## **An 800 kyr planktonic $\delta^{18}\text{O}$ stack for the Western Pacific Warm Pool**

**Christen L. Bowman et al.**

*Correspondence to:* Lorraine E. Lisiecki (lisiecki@geol.ucsb.edu)

The copyright of individual parts of the supplement might differ from the article licence.

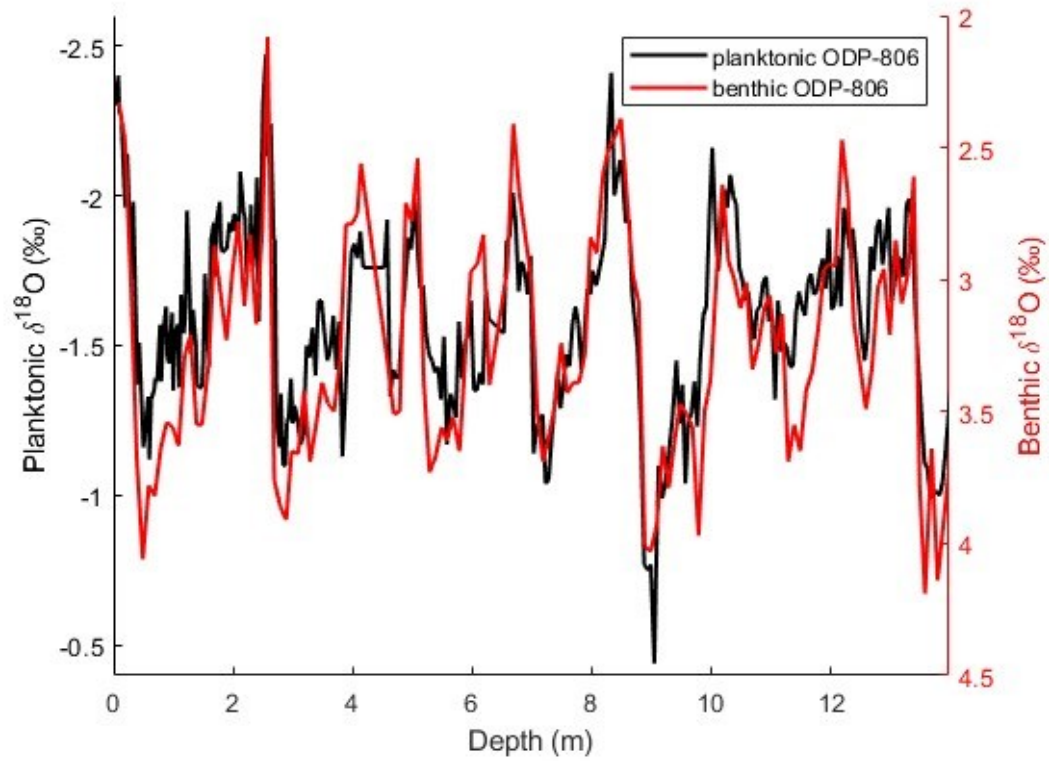

**Figure S1.** Planktonic  $\delta^{18}\text{O}$  (black, Lea et al., 2000; Medina-Elizalde and Lea, 2005) and benthic  $\delta^{18}\text{O}$  (red, Bickert et al., 1993) versus depth for core ODP-806.

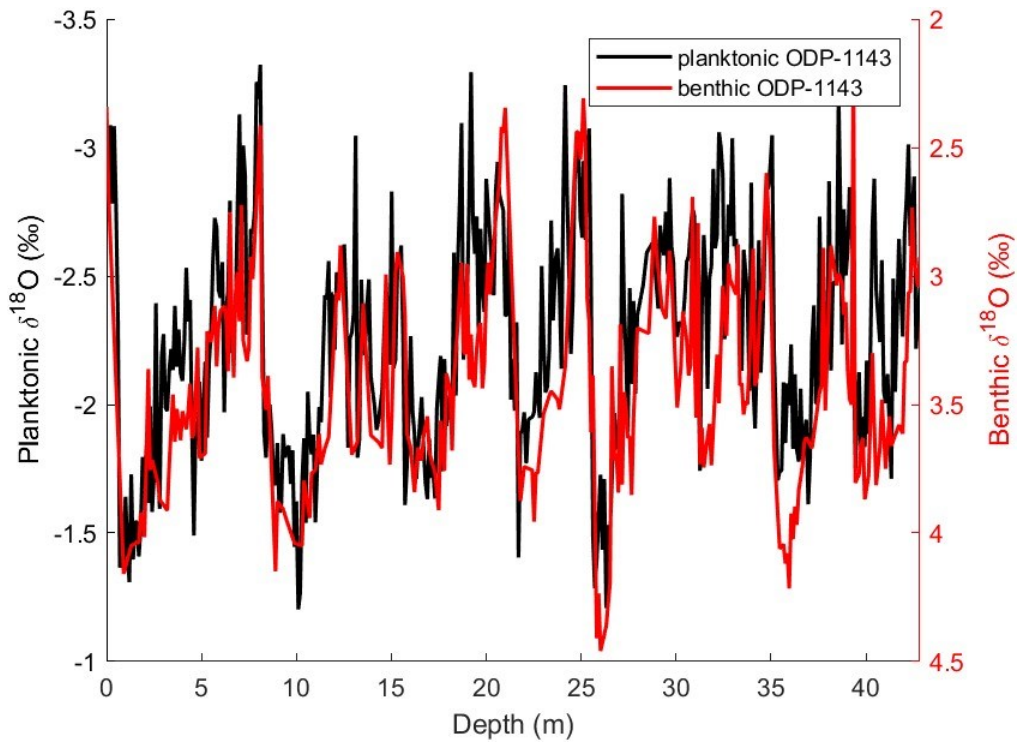

**Figure S2.** Planktonic  $\delta^{18}\text{O}$  (black, Tian et al., 2006) and benthic  $\delta^{18}\text{O}$  (red, Tian et al., 2006) versus depth for core ODP-1143.

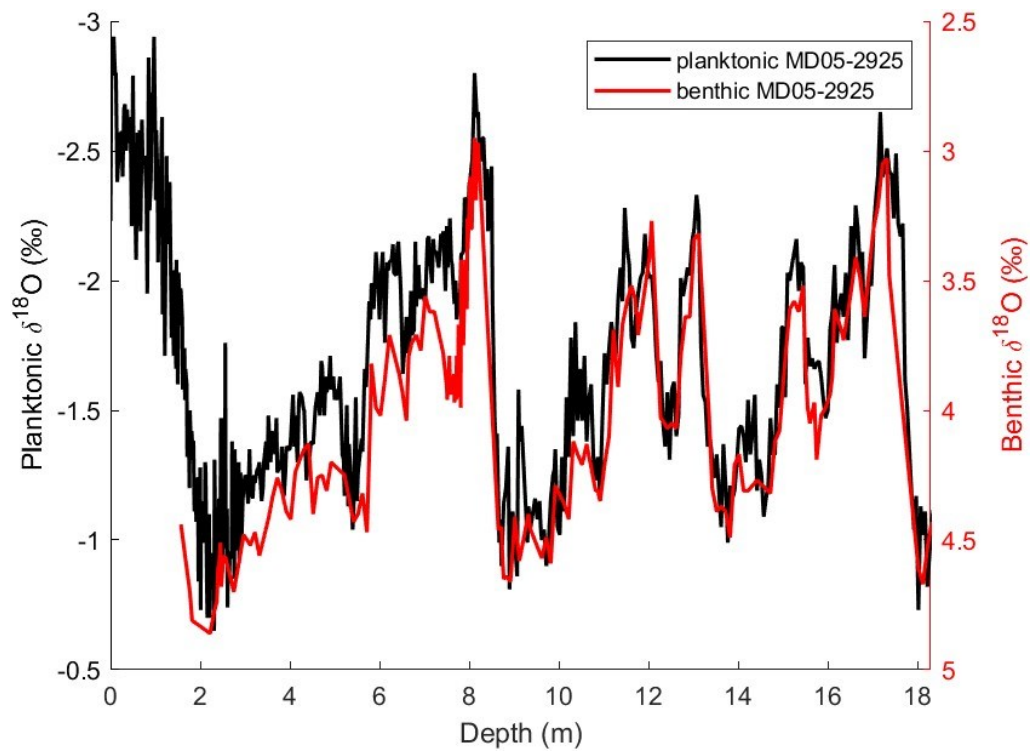

**Figure S3.** Planktonic  $\delta^{18}\text{O}$  (black, Lo et al., 2019) and benthic  $\delta^{18}\text{O}$  (red, Lo et al., 2019) versus depth for core MD05-2925.
